# Supplementary material
Source: PubMed Central journal article supplement (PMC7437516)
Supplement: NIHMS1607842-supplement-2.pdf [file NIHMS1607842-supplement-2.pdf]

## Supplemental Information for

### **Adenosine/A2B receptor signaling ameliorates the effects of ageing and counteracts obesity**

Thorsten Gnad<sup>1</sup>, Gemma Navarro<sup>2,3</sup>, Minna Lahesmaa<sup>4,5</sup>, Laia Reverte-Salisa<sup>1</sup>, Francesca Copperi<sup>1,6</sup>, Arnau Cordomi<sup>7</sup>, Jennifer Naumann<sup>1</sup>, Aileen Hochhäuser<sup>1</sup>, Saskia Haufs-Brusberg<sup>1</sup>, Daniela Wenzel<sup>8,9</sup>, Frank Suhr<sup>10,11</sup>, Naja Zenius Jespersen<sup>12</sup>, Camilla Scheele<sup>12,13</sup>, Volodymyr Tsvilovsky<sup>14</sup>, Christian Brinkmann<sup>15,16</sup>, Joern Rittweger<sup>17,18</sup>, Christian Dani<sup>19</sup>, Mathias Kranz<sup>20</sup>, Winnie Deuther-Conrad<sup>20</sup>, Holger K. Eltzschig<sup>21</sup>, Tarja Niemi<sup>22</sup>, Markku Taittonen<sup>23</sup>, Peter Brust<sup>20</sup>, Pirjo Nuutila<sup>4,5</sup>, Leonardo Pardo<sup>7</sup>, Bernd K. Fleischmann<sup>8,24</sup>, Matthias Blüher<sup>25</sup>, Rafael Franco<sup>2,3</sup>, Wilhelm Bloch<sup>10</sup>, Kirsi A. Virtanen<sup>4,5,26</sup>, Alexander Pfeifer<sup>1,6,24\*</sup>

**Lead contact:** Alexander Pfeifer ([alexander.pfeifer@uni-bonn.de](mailto:alexander.pfeifer@uni-bonn.de))

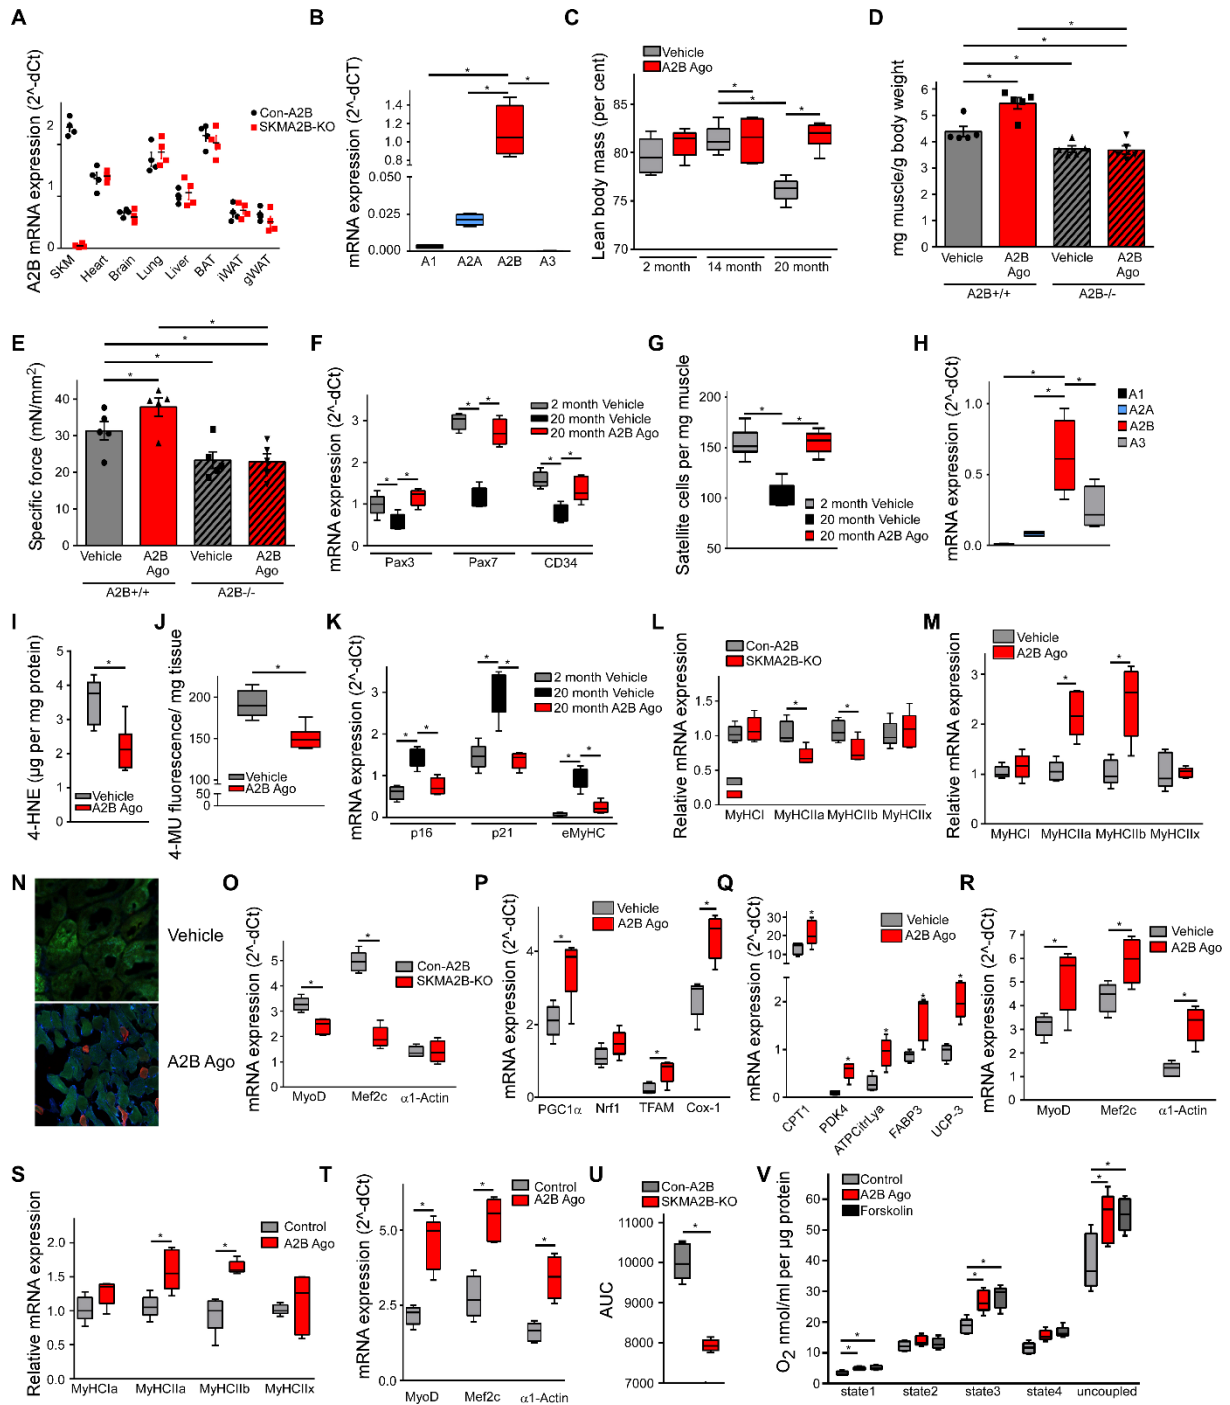

**Figure S1. Related to Figure 1. A2B signaling in skeletal muscle.**

(A) Expression of A2B in mouse tissues (n=4). (B) Expression of AdoRs in C2C12 (n=5). (C) Lean mass of mice treated with A2B agonist for 4 weeks. (n=6). (D,E) Muscle mass per body weight (D) or specific muscle force (E) of A2B+/+ and A2B-/- mice treated with A2B agonist for 4 weeks (n=5). (F) Satellite cell marker genes in EDL of aged mice treated with A2B agonist for 4 weeks (n=6). (G) Satellite cell number in SKM of mice treated with A2B agonist (n=6). (H) Expression of AdoRs in primary satellite cells (n=6). (I,J) 4-HNE (I) and senescence-associated Beta-galactosidase activity (J) in SKM of aged mice treated with A2B agonist for 4 weeks (n=6). (K) Senescence marker genes in SKM of aged mice treated with A2B agonist for 4 weeks (n=6). (L,M) MyHC isoform expression in SKMA2B-KO and Con-A2B mice (L) and mice treated with A2B agonist for 4 weeks (n=6). (N) Representative MyHCI, MyHCIIa and MyHCIIb stain of SKM from mice treated with A2B agonist for 4 weeks. (O) Differentiation marker genes in SKM of SKMA2B-KO and Con-A2B mice (n=6). (P-R) Expression of mitochondrial (P), oxidative metabolism (Q) and muscle differentiation marker genes (R) of mice treated with A2B agonist for four weeks (n=6). (S,T) Expression of MyHC isoforms (S) or myogenic maker genes (T) in C2C12 treated with A2B agonist (300 nM) (n=4). (U) Oxygen consumption of SKMA2B-KO and Con-A2B mice at 23° C (n=6). (V) Oxygen consumption of C2C12 stimulated with A2B agonist (300 nM) or Forskolin (1  $\mu\text{M}$ ) after addition of different substrates (state1: endogenous; state2: ADP; state3: succinate; state4: oligomycin; uncoupled: FCCP). (n=4). \*  $P < 0.05$ . Data are shown as mean + SEM (A,D,E) or Boxplot (with median) and whiskers (1.5x interquartile range) (B,C,F-M,O-V) and analysed with two-tailed student's t-test (I,J,L,M,O-U) or ANOVA with Newman-Keuls post-hoc test (B-H; K,V).

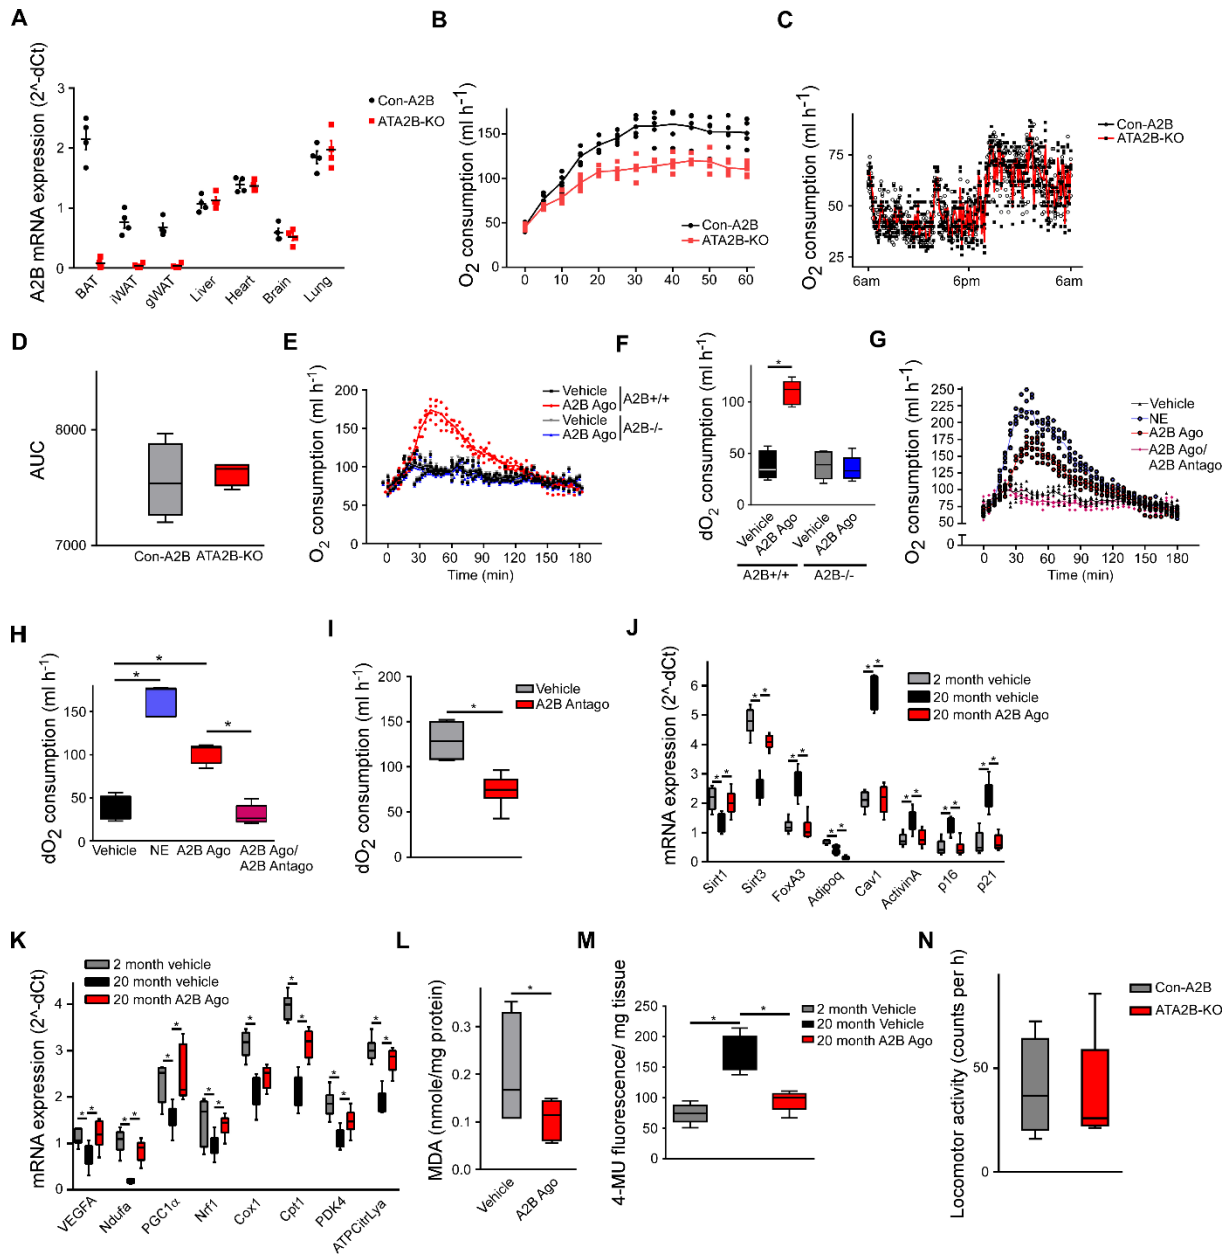

**Figure S2. Related to Figure 2. A2B-mediated BAT activation.**

(A) Expression of adenosine receptor A2B in various tissues of Con-A2B and ATA2B-KO mice ( $n=4$ ). (B) Oxygen consumption of ATA2B-KO and Con-A2B at  $4^{\circ}\text{C}$  ( $n=5$ ). (C,D) 24h oxygen consumption (C) and area under the curve (D) of ATA2B-KO and Con-A2B mice at  $30^{\circ}\text{C}$  ( $n=5$ ). (E,F) Time course (E) and relative increase (F) of oxygen consumption from A2B $^{+/+}$  and A2B $^{-/-}$  mice at  $23^{\circ}\text{C}$  after injection of A2B agonist (1 mg/kg). (G,H) Time course (G) and relative increase (H) of oxygen consumption from wildtype mice at  $23^{\circ}\text{C}$  after injection of NE (1 mg/kg) or A2B agonist (1 mg/kg) in the absence and presence of A2B antagonist (PSB603; 1mg/kg) ( $n=5$ ). (I) Relative oxygen consumption of mice treated with A2B antagonist (PSB603; 1mg/kg) prior to cold exposure ( $n=5$ ). (J,K) Expression of ageing associated genes in young and aged wildtype mice treated with A2B agonist (1 mg/kg). (L,M) Abundance of malondialdehyde (L) and senescence-associated Beta-galactosidase activity (M) in BAT of aged wildtype mice treated with and without A2B agonist (1 mg/kg) ( $n=7$ ). (N) Locomotor activity of ATA2B-KO and Con-A2B mice at  $23^{\circ}$  ( $n=6$ ). \*  $P < 0.05$ . Data are shown as mean + SEM (A-C,E,G) or Boxplot (with median) and whiskers (1.5x interquartile range) (D,F,H-N) and analysed with two-tailed student's t-test (D,I,L,N) or ANOVA with Newman-Keuls post-hoc test (F,H,J,K,M).

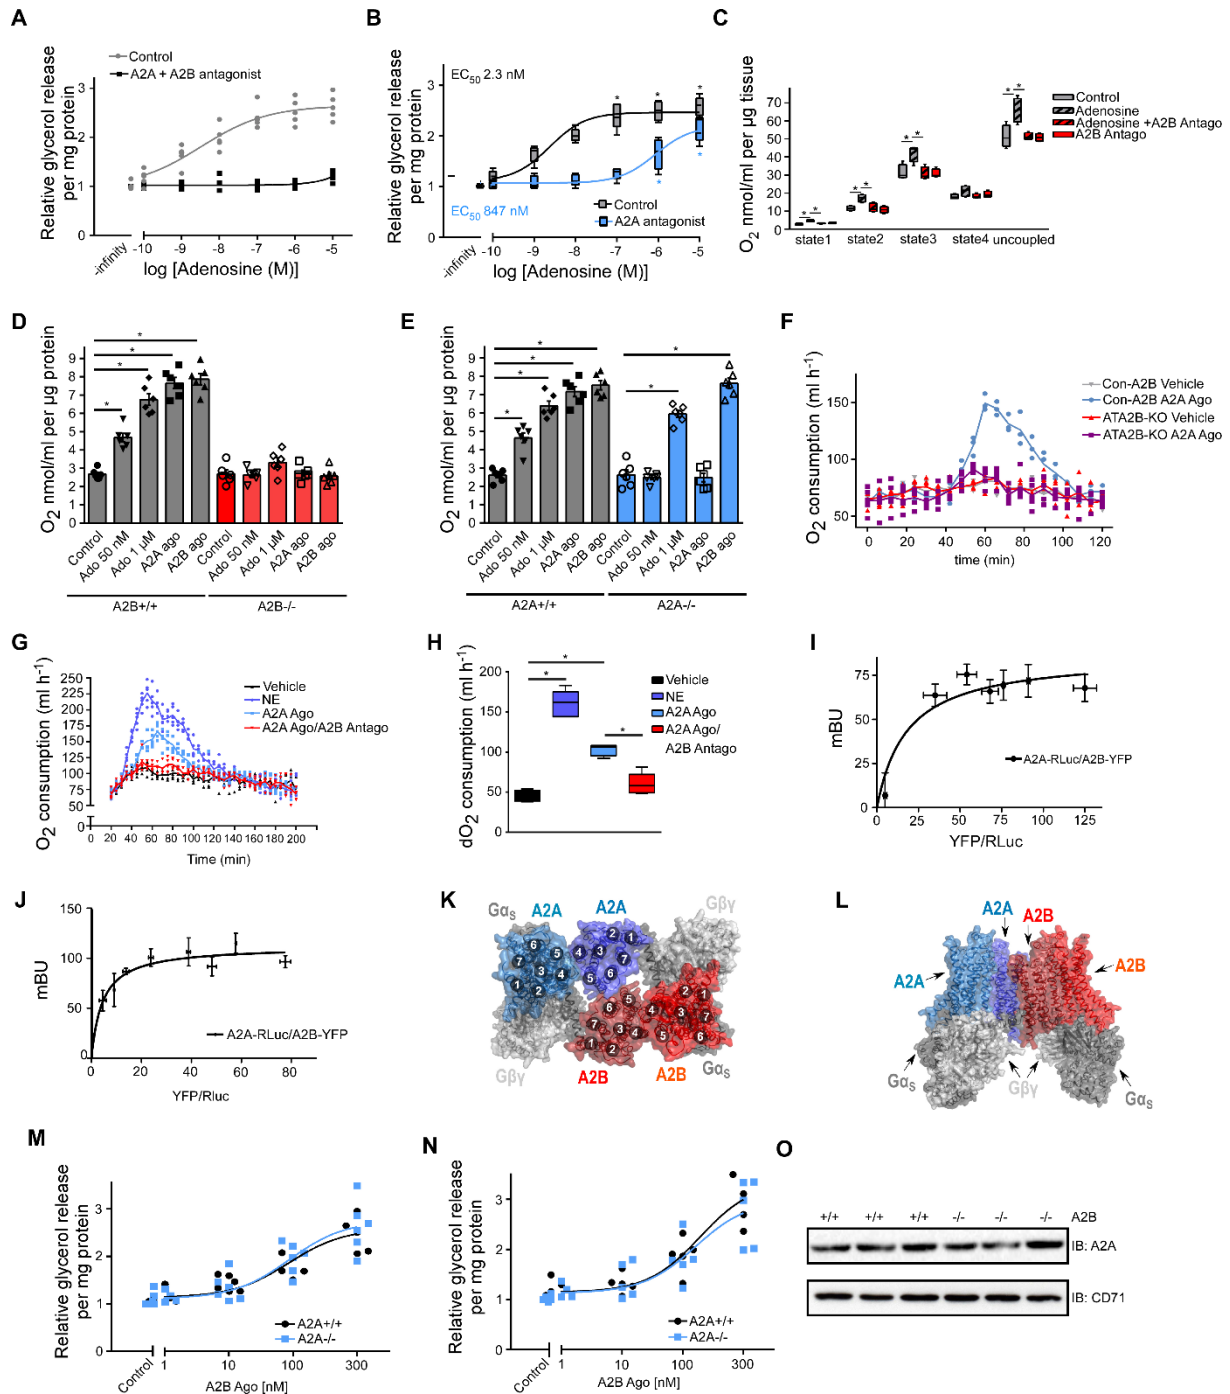

**Figure S3. Related to Figure 3. A2B heterodimerization.**

(A) Dose-response analysis of brown adipocytes treated with increasing concentrations of adenosine in the presence or absence of A2A and A2B antagonist (MSX-2, 300 nM; PSB603, 150 nM) (n=6). (B) Dose-response analysis of brown adipocytes treated with increasing concentrations of adenosine in the presence or absence of A2A antagonist (MSX-2, 300 nM). (C) Oxygen consumption of BAT explants treated with adenosine (1 μM) in the presence and absence of A2B antagonist PSB603 (150 nM) (n=6). (D,E) Oxygen consumption of A2B<sup>-/-</sup> and A2B<sup>+/+</sup> brown adipocytes (D) or A2A<sup>+/+</sup> and A2A<sup>-/-</sup> brown adipocytes (E) treated with and without adenosine (50 nM; 1 μM), A2A agonist (CGS21680; 150 nM) or A2B agonist (Bay 60-6583; 300 nM) (n=6). (F) Oxygen consumption of ATA2B-KO and Con-A2B mice treated with A2A agonist (CGS21680; 1mg/kg) (n=5). (G,H) Oxygen consumption (G) and relative increase in oxygen consumption (H) of wildtype mice injected with vehicle, NE (1 mg/kg), A2A agonist (CGS21680; 1mg/kg) or A2A agonist after pretreatment with A2B antagonist (PSB603; 1 mg/kg) (n=5). (I,J) BRET analysis of A2B and A2A in hMADS (I) and C2C12 (J) cells. (n=4). (K,L) *in silico* model of the extracellular side (K) and perpendicular to the membrane (L) of A2B/A2A interaction. (M,N) Relative lipolysis of A2A<sup>+/+</sup> or A2A<sup>-/-</sup> BAT (M) and BA (N) treated with increasing concentrations of A2B agonist (n=6). (O) Representative immunoblot of A2A and CD71 from wildtype and A2B-deficient BAT membrane isolations. Data are shown as mean + SEM (A,D,G,M,N), mean + SD (I,J) or Boxplot (with median) and whiskers (1.5x interquartile range) (B,C,H) and analyzed with two-tailed student's t-test (B,M,N) or ANOVA with Newman-Keuls post-hoc test (C-E,H).

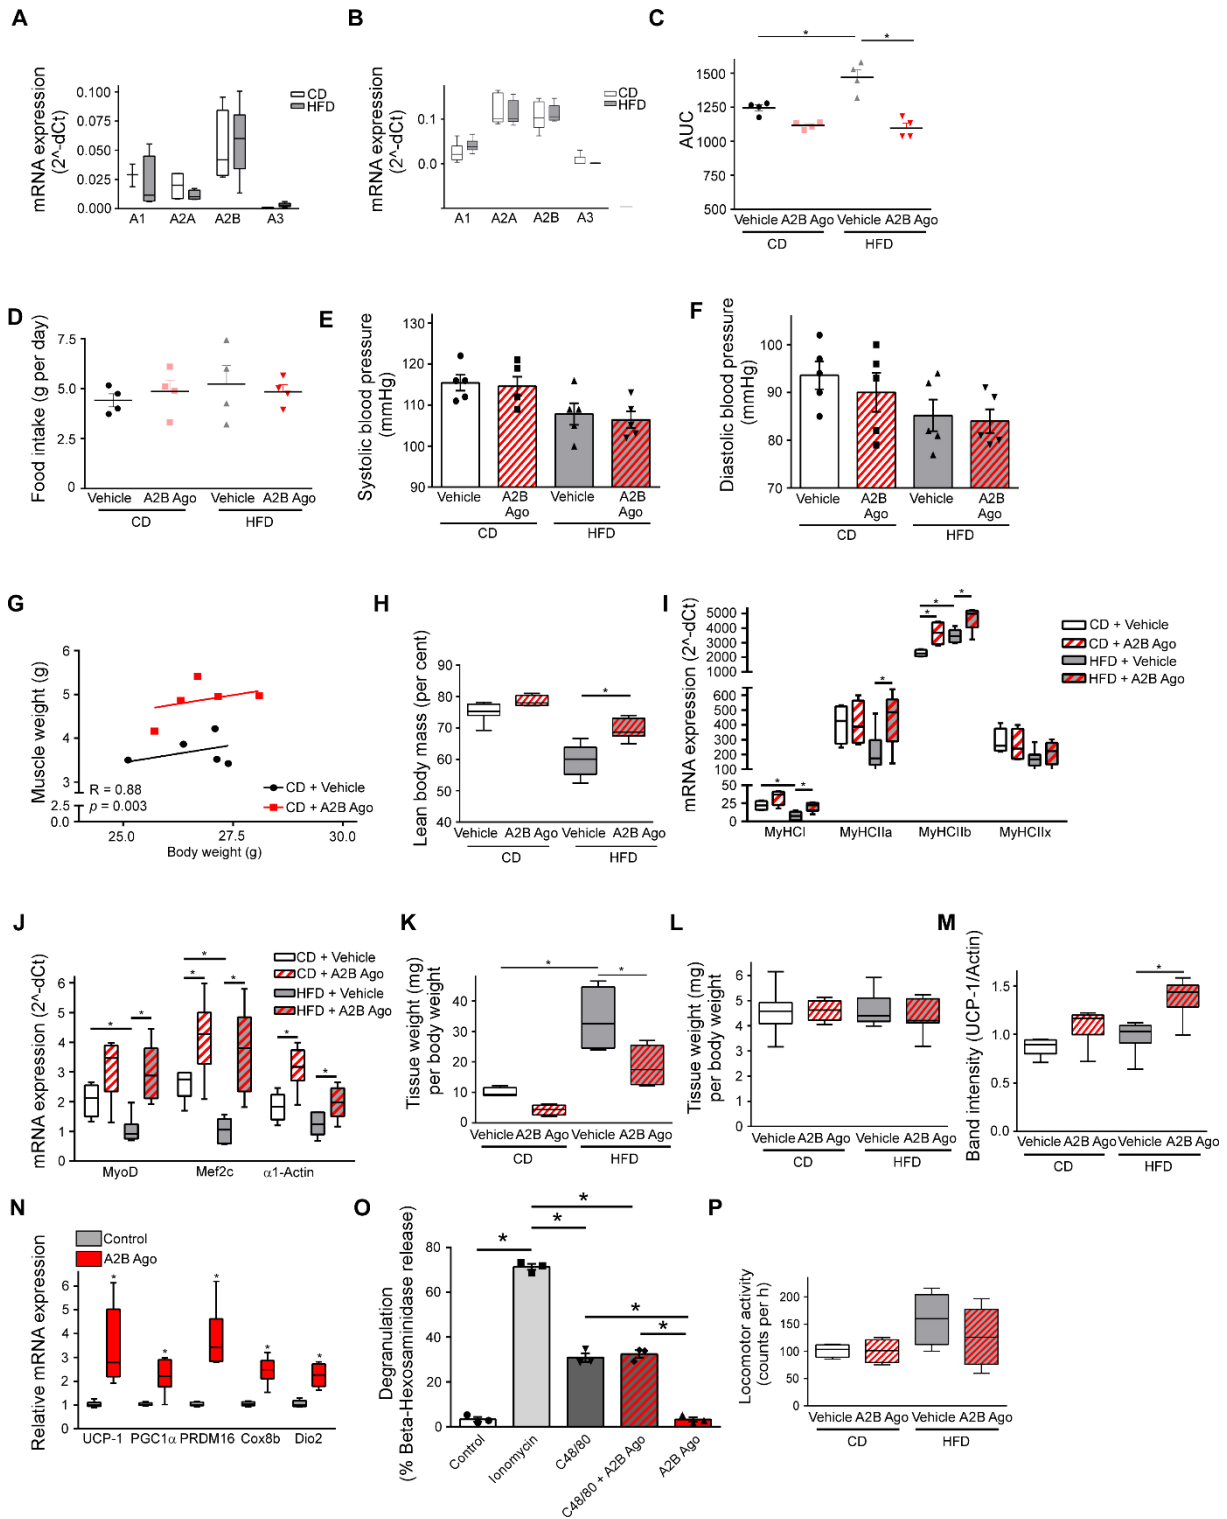

**Figure S4. Related to Figure 4. A2B-treatment counteracts DIO.**

(A,B) Adenosine receptor expression in BAT (A) and SKM (B) of mice fed control diet (CD) or HFD for 12 weeks. (C,D) Relative glucose tolerance (C) and food intake (D) of mice on HFD or CD and treated with and without A2B agonist (1 mg/kg). (E-H) Systolic (E) and diastolic (F) blood pressure, muscle mass (G), as well as lean body mass (H) of mice fed CD or HFD for 12 weeks and treated with A2B agonist (1 mg/kg). (I,J) Expression of MyHC isoforms (I) and myogenic marker genes (J) in *extensor digitorum longus*. (K,L) Tissue weight of gonadal WAT (K) and BAT (L). (M) Quantification of UCP-1 protein expression in inguinal WAT. (N) Thermogenic marker gene expression in primary murine white adipocytes treated with and without A2B agonist (300 nM) (n=4). (O) Degranulation of peritoneum-derived primary mast cells treated with ionomycin and C48/80 in the presence or absence of A2B agonist (300 nM) (n=3). (P) Locomotor activity of mice on HFD or CD and treated with and without A2B agonist. n=5. \*  $P < 0.05$ . Data are shown as mean + SEM (C-F; O) or Boxplot (with median) and whiskers (1.5x interquartile range) (A,B,H-N,P). Data were analyzed with ANCOVA (G), ANOVA with Newman-Keuls post-hoc test (A-F,H-M,O,P) or two-tailed student's t-test (N).

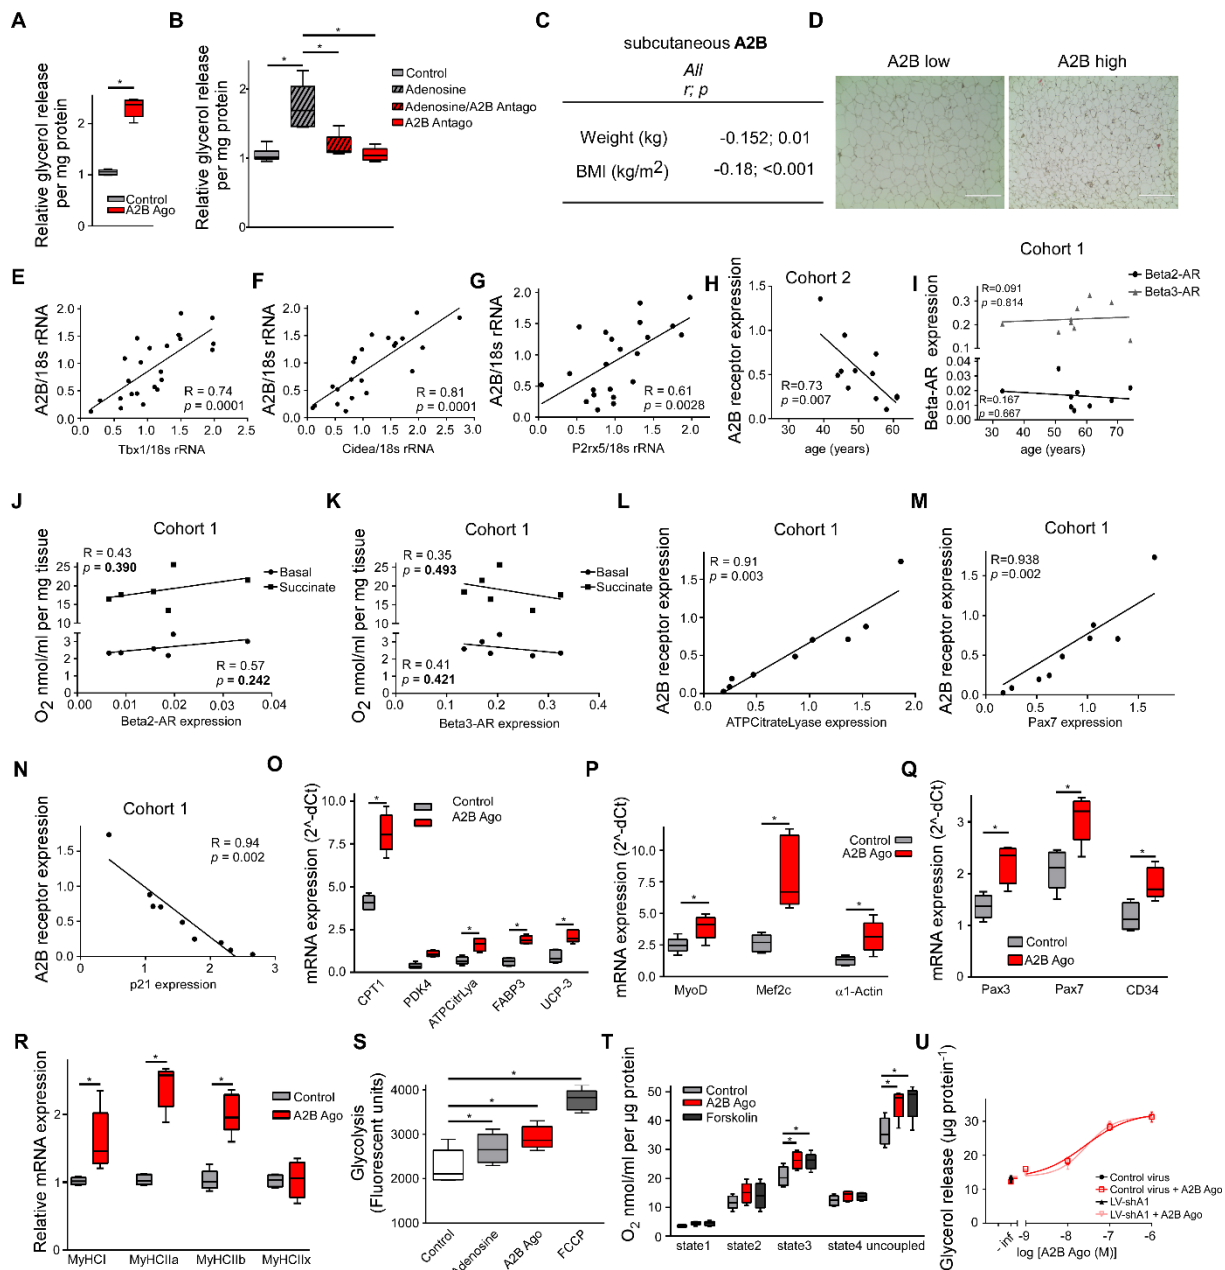

**Figure S5. Related to Figure 5. A2B-signaling in human BAT and SKM.**

(A,B) Lipolysis of primary human brown adipocytes treated with A2B agonist (300 nM) (A) or adenosine (1 μM) and A2B antagonist PSB603 (150 nM) (B) (n=4). (C) Correlation of A2B expression and BMI in inguinal WAT of 405 subjects. Data were analyzed with Spearman correlation coefficient. (D) Representative HE stain of inguinal WAT with high or low A2B expression. (E-G) Correlation of A2B expression with beige adipocyte marker genes Tbx1 (E), Cidea (F) and P2rx5 (G) from 10 subjects with high or low A2B expression, respectively, in subcutaneous WAT. (H) Correlation of A2B expression with age in SKM of former master athletes (n=12). (I) Correlation of beta2- and beta3-AR expression with age in SKM of overweight/obese subjects (c.f. Figure 5J and Table S8) (n=9). (J, K) Correlation of beta2-AR (J) and beta3-AR (K) expression with oxygen consumption in human SKM explants (n=6). (L-N) Correlation of A2B with of ATP Citrate Lyase (L), Pax7 (M) and p21 (N) in SKM explants of overweight/obese subjects (c.f. Figure 5J and Table S8) (n=9). (O-R) Expression of oxidative metabolism (O), myogenic (P) and satellite markers (Q) as well as myosin heavy chain isoforms (R) in human primary myocytes treated with A2B agonist (300 nM). (S) Glycolysis of primary human myocytes treated with adenosine (1 μM), A2B agonist (300 nM), or uncoupling reagent FCCP (1 μM) (n=5). (T) O<sub>2</sub> consumption of primary human myocytes treated with A2B agonist (300 nM) or Forskolin (1 μM) (n=4). (U) Lipolysis of murine brown adipocytes transduced with control or shA1-overexpressing lentivirus and stimulated with increasing concentrations of Bay 60-6583 (n=4). \*  $P < 0.05$ . Data are depicted as mean + SEM (U) or Boxplot (with median) and whiskers (1.5x interquartile range) (A,B,O-T). Data were analyzed with two-tailed student's t-test (A; O-R), ANOVA with Newman-Keuls post-hoc test (B,S,T) or Pearson correlation coefficient (E-N).

| Target  | Sample | Expression (2 <sup>-Δ</sup> -dCt) |
|---------|--------|-----------------------------------|
| 5-HT4   | SM     | 0.0009                            |
|         | BAT    | not detectable                    |
| 5-HT7   | SM     | 0.0008                            |
|         | BAT    | 0.0006                            |
| Adora2a | SM     | 0.0022                            |
|         | BAT    | 0.5730                            |
| Adora2b | SM     | 0.4210                            |
|         | BAT    | 0.3678                            |
| Adrb1   | SM     | 0.0008                            |
|         | BAT    | 0.0154                            |
| Adrb2   | SM     | 0.0277                            |
|         | BAT    | 0.0020                            |
| Adrb3   | SM     | 0.2778                            |
|         | BAT    | 0.4962                            |
| Avpr2   | SM     | 0.0008                            |
|         | BAT    | 0.0178                            |
| Calcr   | SM     | 0.0205                            |
|         | BAT    | not detectable                    |
| Calcr1  | SM     | 0.0103                            |
|         | BAT    | not detectable                    |
| Crhr1   | SM     | 0.0011                            |
|         | BAT    | 0.0117                            |
| Crhr2   | SM     | 0.0012                            |
|         | BAT    | 0.0177                            |
| Drd1    | SM     | 0.0814                            |
|         | BAT    | 0.0647                            |
| Drd5    | SM     | 0.0370                            |
|         | BAT    | not detectable                    |
| Fshr    | SM     | 0.0034                            |
|         | BAT    | not detectable                    |
| Gcgr    | SM     | 0.0004                            |
|         | BAT    | 0.0233                            |
| Ghrhr   | SM     | not detectable                    |
|         | BAT    | not detectable                    |
| Gipr    | SM     | 0.0433                            |
|         | BAT    | 0.0001                            |
| Hrh2    | SM     | 0.0011                            |
|         | BAT    | 0.0158                            |
| Lhcgr   | SM     | 0.0580                            |
|         | BAT    | 0.0004                            |
| Mcr1r   | SM     | 0.0005                            |
|         | BAT    | 0.0004                            |
| Mcr2r   | SM     | 0.0003                            |
|         | BAT    | 0.0029                            |
| Mcr3r   | SM     | 0.0011                            |
|         | BAT    | not detectable                    |
| Mcr4r   | SM     | 0.1088                            |
|         | BAT    | 0.0530                            |
| Mcr5r   | SM     | 0.1051                            |
|         | BAT    | 0.0029                            |
| Ptgdr2  | SM     | not detectable                    |
|         | BAT    | 0.0002                            |
| Ptgir   | SM     | 0.0011                            |
|         | BAT    | not detectable                    |
| Pth1r   | SM     | 0.0327                            |
|         | BAT    | 0.0006                            |
| Sctr    | SM     | 0.0001                            |
|         | BAT    | 0.0182                            |
| Taar1   | SM     | not detectable                    |
|         | BAT    | not detectable                    |
| Tshr    | SM     | 0.0837                            |
|         | BAT    | 0.0583                            |

**Table S1.** Related to **Figure 1.** Gs-coupled GPCR expression in murine BAT and SKM.

| <b>Parameter</b>     | <b>Con-A2B</b>    | <b>SKMA2B-KO</b>  |
|----------------------|-------------------|-------------------|
| Body weight g        | 27.17 +/- 0.31    | 26.52 +/- 0.36    |
| length (nose/anus)   | 8.55 +/- 0.06     | 8.61 +/- 0.04     |
| food intake g/day/bw | 0.172 +/- 0.007   | 0.182 +/- 0.009   |
| Basal glucose mg/dl  | 126.2 +/- 2.01    | 136.5 +/- 2.54    |
| Plasma insulin (pM)  | 60.1 +/- 8.5      | 63.92 +/- 9.9     |
| Body temperature °C  | 36.52 +/- 0.210   | 36.01 +/- 0.184   |
| BAT weight (g/bw)    | 0.0080 +/- 0.0012 | 0.0084 +/- 0.0007 |
| Inguinal WAT (g/bw)  | 0.0126 +/- 0.0011 | 0.0131 +/- 0.0010 |
| gonadal WAT (g/bw)   | 0.0328 +/- 0.0022 | 0.0364 +/- 0.0031 |

**Table S2.** Related to **Figure 1.** Basal metabolic parameters of Con-A2B and SKMA2B-KO mice.



| <b>Parameter</b>                | <b>A2B-Con</b>    | <b>ATA2B-KO</b>   |
|---------------------------------|-------------------|-------------------|
| Food intake (g/day/body weight) | 0.193 +/- 0.008   | 0.190 +/- 0.005   |
| Body weight (g)                 | 25.46 +/- 0.26    | 26.14 +/- 0.40    |
| Gonadal WAT (g/body weight)     | 0.037 +/- 0.001   | 0.044 +/- 0.006   |
| BAT (g/body weight)             | 0.008 +/- 0.00017 | 0.009 +/- 0.00013 |
| Fasting glucose (mg/dl)         | 112.2 +/- 5.45    | 115.6 +/- 7.71    |

**Table S3.** Related to **Figure 2.** Basal metabolic parameters of A2B-Con and ATA2B-KO mice.

| <b>Parameter</b>               | <b>Vehicle</b>  | <b>A2B antagonist (PSB603)</b> |
|--------------------------------|-----------------|--------------------------------|
| Mean oxygen consumption (ml/h) | 74.73 +/- 2.62  | 75.11 +/- 3.84                 |
| Motility (counts/h)            | 54.16 +/- 4.93  | 52.01 +/- 6.63                 |
| Heart rate (bpm)               | 595 +/- 7       | 589 +/- 5                      |
| Body temperature (° C)         | 36.74 +/- 0.276 | 36.53 +/- 0.117                |

**Table S4.** Related to **Figure 3.** Basal metabolic parameters of A2B antagonist (PSB603; 1mg/kg) treated mice.

| <b>Parameter</b>            | <b>Vehicle</b>  | <b>A2B agonist (Bay 60-6583)</b> |
|-----------------------------|-----------------|----------------------------------|
| Sodium (mmol/l)             | 145.2 +/- 2.33  | 147.0 +/- 2.12                   |
| Potassium (mmol/l)          | 4.16 +/- 0.13   | 4.16 +/- 0.18                    |
| Calcium (mmol/l)            | 2.22 +/- 0.08   | 2.25 +/- 0.07                    |
| Total protein (g/l)         | 48.4 +/- 2.80   | 46.6 +/- 2.29                    |
| Cholesterol (mg/dl)         | 68.4 +/- 1.89   | 76.4 +/- 3.11                    |
| ALT (U/l)                   | 23.20 +/- 2.44  | 28.00 +/- 2.68                   |
| AST (U/l)                   | 22.80 +/- 2.60  | 20.80 +/- 1.93                   |
| ALP (U/l)                   | 111.4 +/- 6.22  | 129.6 +/- 8.28                   |
| Albumin (g/l)               | 16.80 +/- 2.01  | 17.60 +/- 1.63                   |
| Alpha-amylase (U/l)         | 1648 +/- 53.36  | 1756 +/- 49.98                   |
| Glucose (mg/dl)             | 226 +/- 17.10   | 237 +/- 22.10                    |
| Blood urea nitrogen (mg/dl) | 18.10 +/- 1.20  | 18.10 +/- 1.39                   |
| Creatinine (mg/dl)          | 0.214 +/- 0.014 | 0.2440 +/- 0.022                 |
| Uric acid (mg/dl)           | 1.88 +/- 0.17   | 2.40 +/- 0.16                    |
| Total Bilirubin (mg/dl)     | 0.44 +/- 0.06   | 0.50 +/- 0.05                    |
| Gamma-GT (U/l)              | 5.94 +/- 0.26   | 6.40 +/- 0.47                    |
| Creatinine kinase (U/l)     | 336.0 +/- 19.05 | 347.0 +/- 25.33                  |

|                               |               |                |
|-------------------------------|---------------|----------------|
| Glutamate dehydrogenase (U/l) | 6.84 +/- 0.41 | 7.16 +/- 0.28  |
| HDL (mg/dl)                   | 65.0 +/- 3.76 | 65.6 +/- 2.77  |
| LDL (mg/dl)                   | 97.4 +/- 5.34 | 103.8 +/- 4.36 |

**Table S5.** Related to **Figure 4.** Clinical chemistry parameters from mice chronically-treated with vehicle or A2B agonist (Bay 60-6583; 1 mg/kg).

| Number | Weight group | Age | BMI  | Fat% | Total fat mass | Waist (cm) |
|--------|--------------|-----|------|------|----------------|------------|
| 1      | Lean         | 51  | 26,6 | 24,8 | 18,8           | 82         |
| 2      | Lean         | 38  | 23,0 | 19,0 | 14,3           | 80         |
| 3      | Lean         | 37  | 25,4 | 22,9 | 17,2           | 85         |
| 4      | Lean         | 21  | 26,5 | 20,3 | 16,8           | 87         |
| 5      | Lean         | 22  | 21,8 | 13,9 | 8,6            | 73         |
| 6      | Lean         | 22  | 22,6 | 14,2 | 10,6           | 77         |
| 7      | Lean         | 28  | 24,1 | 19,4 | 14,3           | 80         |
| 8      | Lean         | 18  | 23,1 | 16,0 | 12,1           | 79         |
| 9      | Overweight   | 25  | 33,3 | 27,7 | 29,4           | 110        |
| 10     | Overweight   | 54  | 30,9 | 25,6 | 23,9           | 108        |
| 11     | Overweight   | 46  | 33,8 | 31,5 | 30,4           | 116        |
| 12     | Overweight   | 28  | 30,6 | 26,8 | 26,5           | 111        |

|                                  | BMI         | Age         |
|----------------------------------|-------------|-------------|
| <b>Lean average (n=8):</b>       | <b>24,1</b> | <b>29,6</b> |
| s.d.                             | 1,7         | 10,7        |
| <b>Overweight average (n=4):</b> | <b>32,1</b> | <b>38,3</b> |
| s.d.                             | 1,7         | 14,0        |

**Table S6.** Related to **Figure 5A-G.** Characteristic parameters of analyzed subjects.

| Number                  | A2B expression | Age | BMI         | sex         | diabetes |
|-------------------------|----------------|-----|-------------|-------------|----------|
| 1                       | low            | 65  | 26          | m           | no       |
| 2                       | low            | 63  | 25          | m           | no       |
| 3                       | low            | 59  | 43          | m           | T2D      |
| 4                       | low            | 58  | 48          | m           | T2D      |
| 5                       | low            | 52  | 56          | f           | T2D      |
| 6                       | low            | 48  | 52          | m           | T2D      |
| 7                       | low            | 37  | 56          | f           | T2D      |
| 8                       | low            | 36  | 50          | f           | no       |
| 9                       | low            | 35  | 48          | m           | no       |
| 10                      | low            | 31  | 48          | m           | no       |
| 11                      | high           | 83  | 19          | m           | no       |
| 12                      | high           | 60  | 41          | f           | T2D      |
| 13                      | high           | 52  | 39          | f           | no       |
| 14                      | high           | 49  | 33          | m           | T2D      |
| 15                      | high           | 49  | 22          | m           | no       |
| 16                      | high           | 37  | 20          | m           | no       |
| 17                      | high           | 36  | 54          | f           | T2D      |
| 18                      | high           | 35  | 19          | m           | no       |
| 19                      | high           | 35  | 32          | f           | no       |
| 20                      | high           | 19  | 30          | m           | T2D      |
|                         |                |     | <b>BMI</b>  | <b>Age</b>  |          |
| <b>A2B low average</b>  |                |     | <b>45,0</b> | <b>48,4</b> |          |
| s.d.                    |                |     | 11,0        | 12,6        |          |
| <b>A2B high average</b> |                |     | <b>32,2</b> | <b>45,3</b> |          |
| s.d.                    |                |     | 11,5        | 17,4        |          |

**Table S7.** Related to **Figure 5H,I** and **Figure S5D-G**. Characteristic parameters of analyzed subjects.

| <b>Number</b> | <b>Age</b> | <b>BMI</b> | <b>diabetes</b> |
|---------------|------------|------------|-----------------|
| 1             | 33         | 26         | T2D             |
| 2             | 51         | 25         | T2D             |
| 3             | 54         | 43         | T2D             |
| 4             | 55         | 48         | T2D             |
| 5             | 55         | 56         | T2D             |
| 6             | 56         | 52         | T2D             |
| 7             | 57         | 56         | T2D             |
| 8             | 61         | 50         | T2D             |
| 9             | 68         | 48         | T2D             |
| 10            | 74         | 48         | T2D             |

**Table S8 (Cohort 1).** Related to Figure **5J-M** and Figure **S5I-N**. Characteristic parameters of analyzed subjects.

| Number | Age | BMI   | sex |
|--------|-----|-------|-----|
| 1      | 39  | 23.04 | m   |
| 2      | 55  | 21.72 | m   |
| 3      | 61  | 23.24 | m   |
| 4      | 61  | 22.49 | m   |
| 5      | 45  | 24.07 | m   |
| 6      | 46  | 21.72 | f   |
| 7      | 49  | 31.40 | m   |
| 8      | 58  | 27.10 | f   |
| 9      | 44  | 22.49 | f   |
| 10     | 54  | 24.93 | f   |
| 11     | 47  | 20.91 | m   |
| 12     | 55  | 17.09 | f   |

**Table S9.** Related to Figure S5H. Characteristic parameters of analyzed subjects.

| <b>Acronym</b> | <b>Meaning</b>                                                          |
|----------------|-------------------------------------------------------------------------|
| Adrb3          | Beta3-adrenergic receptor                                               |
| Drd1           | Dopamine receptor d1                                                    |
| Mc4r           | Melanocortin 4 receptor                                                 |
| Tshr           | Thyroid stimulating hormone receptor                                    |
| Pax3           | Paired box 3                                                            |
| Pax7           | Paired box 7                                                            |
| CD34           | Cluster of differentiation 34                                           |
| 4-MU           | 4-methylumbelliferone                                                   |
| p16            | Cyclin Dependent Kinase Inhibitor 2A                                    |
| p21            | Cyclin Dependent Kinase Inhibitor 1A                                    |
| eMyHC          | Embryonic myosin heavy chain                                            |
| PGC1 $\alpha$  | Peroxisome Proliferator-Activated Receptor Gamma Coactivator<br>1 Alpha |
| Nrf1           | Nuclear Respiratory Factor 1                                            |
| TFAM           | Mitochondrial Transcription Factor 1                                    |
| Cox-1          | Cytochrome c oxidase subunit I                                          |
| CPT1           | Carnitine Palmitoyltransferase 1                                        |
| PDK4           | Pyruvate Dehydrogenase Kinase 4                                         |
| ATP            | ATP Citrate Lyase                                                       |
| FABP3          | Fatty Acid Binding Protein 3                                            |
| UCP-3          | Uncoupling protein-3                                                    |
| Sirt1          | Sirtuin 1                                                               |
| Sirt3          | Sirtuin 3                                                               |
| FoxA3          | Forkhead Box A3                                                         |

|        |                                                                          |
|--------|--------------------------------------------------------------------------|
| Adipoq | Adiponectin                                                              |
| Cav1   | Caveolin 1                                                               |
| VEGFA  | Vascular Endothelial Growth Factor A                                     |
| Ndufa  | NADH:Ubiquinone Oxidoreductase Subunit A1                                |
| PRDM16 | PR domain containing 16                                                  |
| ND5    | Mitochondrially Encoded NADH:Ubiquinone Oxidoreductase<br>Core Subunit 5 |
| HE     | Hematoxylin and eosin                                                    |
| A1     | Adenosine receptor A1                                                    |
| A3     | Adenosine receptor A3                                                    |
| MyoD   | Myogenic Differentiation 1                                               |
| Mef2c  | Myocyte Enhancer Factor 2C                                               |
| MDA    | Malondialdehyde                                                          |
| Cox-8  | Cytochrome C Oxidase Subunit 8                                           |
| Dio2   | Iodothyronine Deiodinase 2                                               |
| Tbx1   | T-Box Transcription Factor 1                                             |
| Cidea  | Cell Death Inducing DFFA Like Effector A                                 |
| P2rx5  | Purinergic Receptor P2X 5                                                |
| FCCP   | Carbonyl cyanide-p-trifluoromethoxyphenylhydrazone                       |

**Table S10.** Related to **Figure 1, Figure 2, Figure 4 and Figure 5.** Definition of acronyms.
